# Supplementary material for: Construction of a HPLC-SERS hyphenated system for continuous separation and detection based on paper substrates
Source: Royal Society of Chemistry journal article supplement (doi:10.1039/d2an00993e), 2022-01-01
Supplement: d2an00993e1.pdf [file d2an00993e1.pdf]

**Supplementary information:**

**Construction on HPLC-SERS Hyphenated System for Continuous  
Separation and Detection Based on Paper Substrates**

Kerui Shen, Yaxian Yuan,\* Chenjie Zhang and Jianlin Yao\*

*College of Chemistry, Chemical Engineering and Materials Science, Soochow  
University, Suzhou 215123, China*

*Corresponding author. E-mail: [yuanyaxian@suda.edu.cn](mailto:yuanyaxian@suda.edu.cn), [jlyao@suda.edu.cn](mailto:jlyao@suda.edu.cn)*

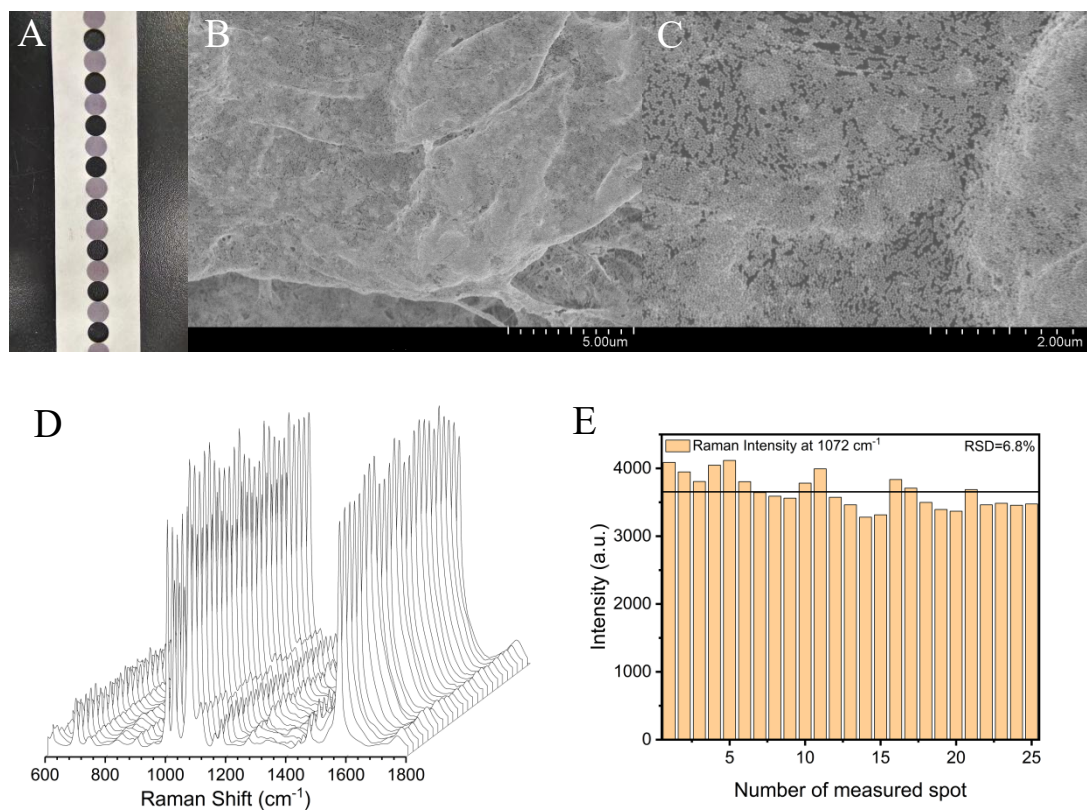

**Fig. S1** Photograph (A) and SEM images (B, C) of the paper substrate; (D) SERS spectra of thiophenol (TP) from 25 selected spots on the paper substrate; (E) Comparison of SERS intensity of TP at 1072 cm<sup>-1</sup>.

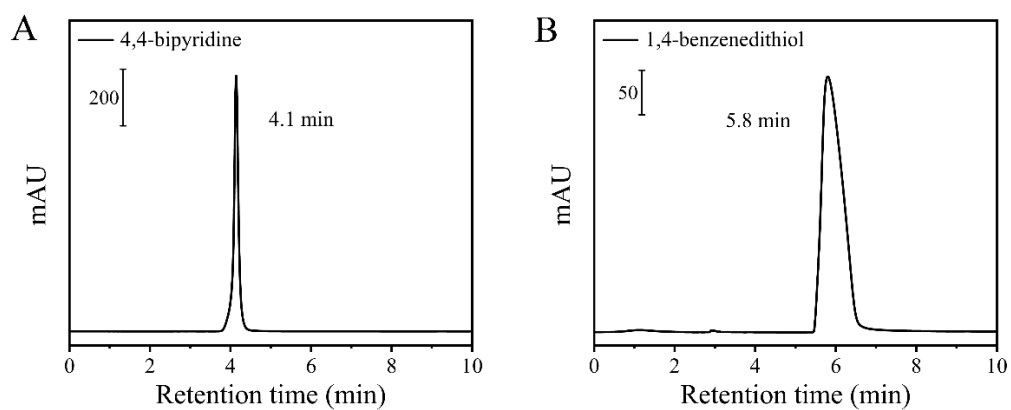

**Fig. S2** Chromatograms of  $10^{-3}$  mol·L<sup>-1</sup> 4,4'-bipyridine (A) and 1,4-benzenedithiol (B).

A mixture of methanol and 10 mM ammonium acetate aqueous solution (v/v 60:40)

was used as the mobile phase with a system flow rate of 1 mL·min<sup>-1</sup>.

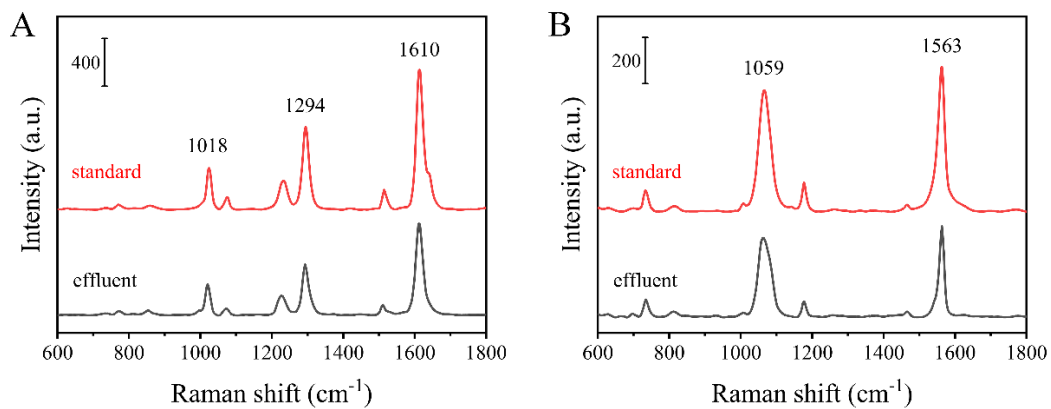

**Fig. S3** (A) SERS spectra of 4,4'-bipyridine effluent and standard solution; (B) SERS spectra of 1,4-benzenedithiol effluent and standard solution.

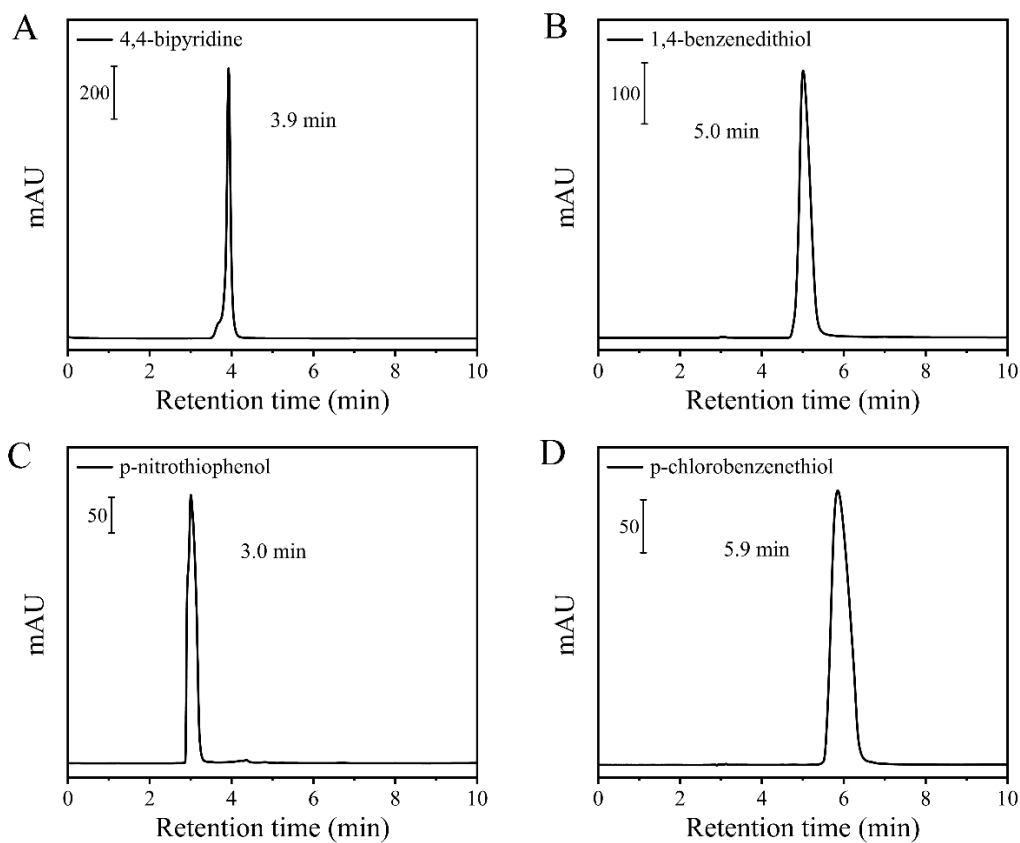

**Fig. S4** Chromatograms of  $10^{-3}$  mol·L $^{-1}$  4,4'-bipyridine (A), 1,4-benzenedithiol (B), p-nitrothiophenol (C) and p-chlorobenzenethiol (D). A mixture of methanol and 10 mM ammonium acetate aqueous solution (v/v 65:35) was used as the mobile phase with a system flow rate of 1 mL·min $^{-1}$ .

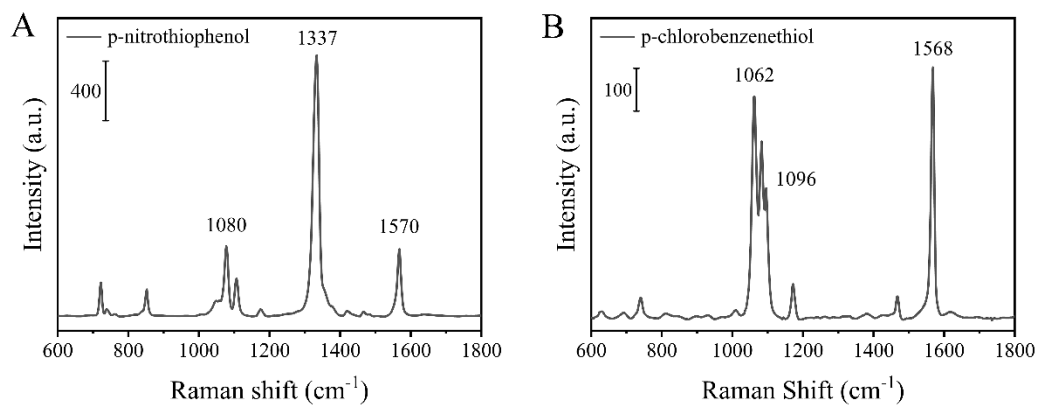

**Fig. S5** SERS spectra of p-nitrothiophenol (A) and p-chlorobenzenethiol (B).

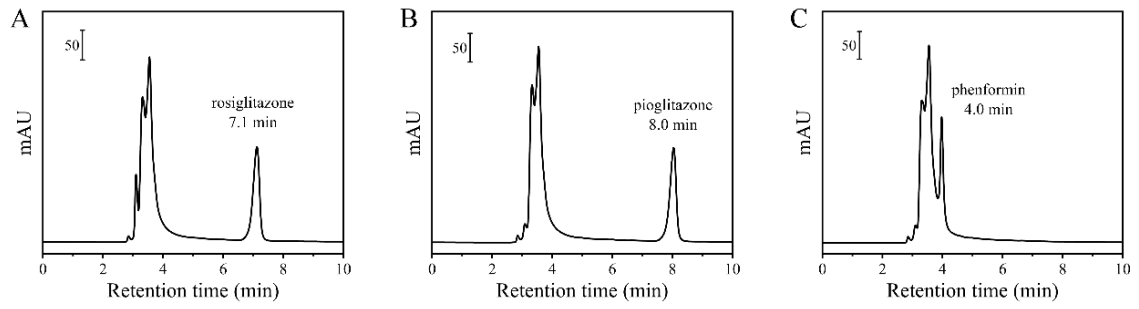

**Fig. S6** Chromatograms of health products added with rosiglitazone maleate (A), pioglitazone hydrochloride (B) and phenformin hydrochloride (C), respectively.
